# Supplementary material
Source: publisher figshare collection journal article supplement (https://rs.figshare.com/ndownloader/files/17427095)
Supplement: Supplementary file [file 17427095]

# **Supporting Material: Migratory convergence facilitates cultural transmission of humpback whale song**

**Clare Owen, Luke Rendell, Rochelle Constantine, Michael J. Noad, Jenny Allen, Olive Andrews, Claire Garrigue, M. Michael Poole, David Donnelly, Nan Hauser, Ellen C. Garland.**

## **1. Supplementary Results**

### **1.1. Description of song types**

Song type 1 contained eight themes and 15 phrase types (figure 1, table S2). Six phrase types were present in New Caledonia (7A, 9A, 11A, 12A-B, 14A), five in Tonga (7C, 8A-B, 9A, 10A), 13 in the Cook Islands (7A-C, 8A-B, 9A, 10A & C, 11A, 12A-B, 13A, 14A) and ten in French Polynesia (7A-7C, 8A-B, 9A, 10A-C, 11A). Song type 1 was the dominant song in the central Pacific (*i.e.*, the Cook Islands and French Polynesia) and was highly complex. It contained two versions and a high level of individual and population variation.

Song type 2 contained six themes and 18 phrase types (figure 1, table S2). Of these 18 phrase types, 17 were present in New Caledonia (1A-B, 2A-B, 3A-D, 4A-C, 5A-C, 6A-C), 15 in Tonga (1A-B, 2A-B, 3A & C, 4B-C, 5A-B, 6A-C), 13 in Niue (1A-B, 2A-C, 3A, 4A-B, 5A-5B, 6A-C), and ten in the Cook Islands (1A-B, 2B-C, 3C, 5B-C, 6A-C). Song type 2 was most prevalent in the west (New Caledonia, Tonga and Niue). The song was acoustically complex and contained a large number of themes and phrases. Although only one version of this song was present, there was evidence of very fine-scale individual and population level variation.

Song type 3 contained three themes and five phrase types, all of which were present only in eastern Australia (15A-B, 16A-B, 17A). Song type 3 was very simple as it contained five phrases which were highly stereotyped with little variation both within and among the different singers.

The Kermadec recordings contained 22 (of the 38) phrase types including all of the phrases present in song 2 (1A-B, 2A-2C, 3A-D, 4A-C, 5A-C, 6A-C) and three from song type 1b (7A, 12B, 14A). A single phrase type (8C) was only recorded in the Kermadecs and was assigned to song type 1 (based on quantitative LSI clustering).

### **1.2. Fine-scale theme similarity of Kermadec singers with the wintering grounds**

Hierarchical clustering of theme 1 divided the data into 13 stable clusters (AU > 95%; figure 3a). Three clusters paired a singer from the Kermadecs with singers from Tonga, resulting in seven Kermadec singers being assigned to Tonga, and one cluster paired a Kermadec singer with Niue (AU *p*-value > 95%; figure 3a, table 1). Phrases from theme 3 were divided into 17 stable clusters (AU *p*-value > 95%; figure 3b). Here, five singers from the Kermadecs were paired with Tonga and three with New Caledonia (AU *p*-value > 95%; figure 3b, table 1); Kermadec singers were not paired with a specific wintering ground on the remaining clusters.

Author for correspondence: Ellen Garland ([ecg5@st-andrews.ac.uk](mailto:ecg5@st-andrews.ac.uk)).  
Present address: School of Biology, University of St. Andrews, St. Andrews, KY16 8LB, United Kingdom

## 2. Supplementary Tables

**Table S1.** Song recordings included in each level of the analysis.

| Location          | Total # singers | Total time (hh:mm:ss) | Recording date range (dd/mm/yy) | Unit-level transcription |                    | Theme-level transcription |                  | Song types present |
|-------------------|-----------------|-----------------------|---------------------------------|--------------------------|--------------------|---------------------------|------------------|--------------------|
|                   |                 |                       |                                 | # Singers                | # Complete phrases | # Singers                 | # Song sequences |                    |
| Kermadec Islands  | 39              | 03:57:36              | 29/09/15 - 08/10/15             | 39                       | 631                | 17                        | 31               | 1, 2               |
| Eastern Australia | 11              | 02:10:00              | 01/10/15 - 15/10/15             | 11                       | 303                | 6                         | 15               | 3                  |
| New Caledonia     | 11              | 05:51:25              | 18/07/15 - 09/09/15             | 11                       | 1182               | 9                         | 43               | 1, 2               |
| Tonga             | 8               | 01:20:06              | 21/08/15 - 14/09/15             | 8                        | 229                | 7                         | 11               | 1, 2               |
| Niue              | 7               | 01:24:01              | 22/08/15 - 01/09/15             | 7                        | 143                | 6                         | 9                | 2                  |
| Cook Islands      | 8               | 01:42:14              | 21/08/15 - 20/09/15             | 8                        | 444                | 6                         | 16               | 1, 2               |
| French Polynesia  | 7               | 02:57:49              | 24/09/15 - 04/10/15             | 7                        | 570                | 6                         | 25               | 1                  |
| <b>Total</b>      | <b>91</b>       | <b>19:23:11</b>       | <b>Jul-Oct 2015</b>             | <b>91</b>                | <b>3502</b>        | <b>57</b>                 | <b>150</b>       |                    |

**Table S2.** Additional singer information corresponding to table 1 Kermadec singers including recording number, date and duration, singer number and number of phrases included in analysis from each ‘singer’. When multiple singers were present in a recording or a singer was silent for more than three minutes before the song continued, it was not always possible to confirm the same singer was resuming. To avoid ambiguity, the subsequent phrases were labelled with a letter (e.g., KI01S1a) and the strings of phrases were analysed separately. Only singers that sung >1 phrase type are included in the table.

| Recording # | Recording date | Recording duration (mm:ss) | Kermadec singer # | # phrases |
|-------------|----------------|----------------------------|-------------------|-----------|
| KI15-01     | 29-Sep-2015    | 16:36                      | KI01S1            | 5         |
|             |                |                            | KI01S1a           | 8         |
|             |                |                            | KI01S1b           | 5         |
| KI15-02     | 29-Sep-2015    | 09:14                      | KI02S1a           | 5         |
|             |                |                            | KI02S2            | 2         |
|             |                |                            | KI02S3            | 5         |
| KI15-03     | 29-Sep-2015    | 11:01                      | KI03S3            | 5         |
|             |                |                            | KI03S4            | 7         |
|             |                |                            | KI03S5            | 2         |
| KI15-04     | 30-Sep-2015    | 13:31                      | KI04S1            | 3         |
|             |                |                            | KI04S1b           | 4         |
|             |                |                            | KI04S2            | 4         |
|             |                |                            | KI04S3            | 5         |
| KI15-05     | 01-Oct-2015    | 32:00                      | KI05S1            | 6         |
|             |                |                            | KI05S2            | 11        |
|             |                |                            | KI05S3            | 5         |
| KI15-06     | 02-Oct-2015    | 28:01                      | KI06S1            | 10        |
| KI15-10     | 04-Oct-2015    | 09:16                      | KI10S1            | 5         |
|             |                |                            | KI10S2b           | 3         |
| KI15-11     | 04-Oct-2015    | 06:48                      | KI11S1            | 2         |
| KI15-12     | 08-Oct-2015    | 39:26                      | KI12S1            | 3         |
|             |                |                            | KI12S2            | 5         |
|             |                |                            | KI12S3            | 7         |
|             |                |                            | KI12S4            | 10        |
|             |                |                            | KI12S5            | 10        |
|             |                |                            | KI12S6            | 6         |
|             |                |                            | KI12S7            | 5         |
| KI15-13     | 08-Oct-2015    | 33:28                      | KI13S1            | 11        |

|              |             |                |                     |            |
|--------------|-------------|----------------|---------------------|------------|
| KI15-14      | 08-Oct-2015 | 30:17          | KI14S1              | 10         |
|              |             |                | KI14S1a             | 7          |
|              |             |                | KI14S2              | 3          |
| <b>Total</b> | <b>11</b>   | <b>3:49:38</b> | <b>31 'singers'</b> | <b>179</b> |

**Table S3.** Most representative (set median) sequence of units for every phrase type for all song types included in the study (weighted analysis). Song type 1 included themes 7-14, song type 2 themes 1-6, and song type 3 themes 15-17. KI=Kermadec Islands, EA=eastern Australia, NC=New Caledonia, TO=Tonga, NI=Niue, CI=Cook Islands, FP=French Polynesia. Each letter or combination of letters represents a unit type (see table S4 for unit names). A comma separates units.

[illegible]

**Table S4.** Unit names for all unit abbreviations in table S2.

| Unit code     | Unit name                                       |
|---------------|-------------------------------------------------|
| AC(H)         | High ascending cry                              |
| AGR           | Ascending groan                                 |
| AGR(H)        | High ascending groan                            |
| AGR(L)        | Long ascending groan                            |
| AGR(S)-DW     | Short ascending groan – descending whistle      |
| AGR(S)-MODW   | Short ascending groan – modulated whistle       |
| AM            | Ascending moan                                  |
| AM(L)         | Long ascending moan                             |
| AM(P)         | Pulsed ascending moan                           |
| AS(S)         | Ascending shriek                                |
| AS(S)-AW      | Ascending shriek – ascending whistle            |
| ASQ           | Ascending squeak                                |
| AW            | Ascending whistle                               |
| BA            | Bark                                            |
| BA(H)         | High bark                                       |
| BA(P)         | Pulsed bark                                     |
| BE            | Bellow                                          |
| BE-TI(A)      | Bellow – ascending trill                        |
| BP            | Flat beep                                       |
| BP(A)         | Ascending beep                                  |
| C(H)          | High, flat cry                                  |
| DC(S)         | Short descending cry                            |
| DGR           | Descending groan                                |
| DGR(L)        | Long descending groan                           |
| DGR(S)        | Short descending groan                          |
| DGW           | Descending growl                                |
| DW            | Descending whistle                              |
| E             | E sound                                         |
| EE(L)         | Long double e sound                             |
| GR(S)         | Short, flat groan                               |
| GR-AW         | Flat, groan – ascending whistle                 |
| GR-WHOP       | Flat groan - whop                               |
| GR(S)-NSQ     | Short, flat groan – N-shaped squeak             |
| GR(S)-SQ      | Short, flat groan - flat squeak                 |
| GR(S)-SQ-MODC | Short, flat groan – flat squeak – modulated cry |
| GT            | Grunt                                           |
| GW            | Flat growl                                      |
| GW(L)         | Long growl                                      |
| GW(MOD)(L)    | Long modulated growl                            |
| LWP           | Low whoop                                       |
| M             | Flat moan                                       |
| MODC(H)(L)    | High, long modulated cry                        |
| MODGR         | Modulated groan                                 |
| MODW          | Modulated whistle                               |
| NGR(S)        | Short N-shaped groan                            |
| P             | Flat purr                                       |
| P(A)          | Ascending purr                                  |
| P(MOD)(L)     | Long modulated purr                             |
| P-AGR         | Flat purr – Ascending groan                     |
| P-LWP         | Flat purr – low whoop                           |
| PE-AM         | Pulsed element- ascending moan                  |
| QK            | Quack                                           |
| SC            | Flat scream                                     |
| SC(L)         | Long flat scream                                |
| SC-E          | Screamy e                                       |
| SQ            | Flat squeak                                     |
| TI(A)         | Ascending trill                                 |
| TI(MOD)(L)    | Long, modulated trill                           |
| UC(S)-C(H)    | Short, U-shaped cry – high cry                  |
| UC(S)-C(H)(S) | Short, U-shaped cry – high, short cry           |
| WP            | Whoop                                           |

### 3. Supplementary Figures

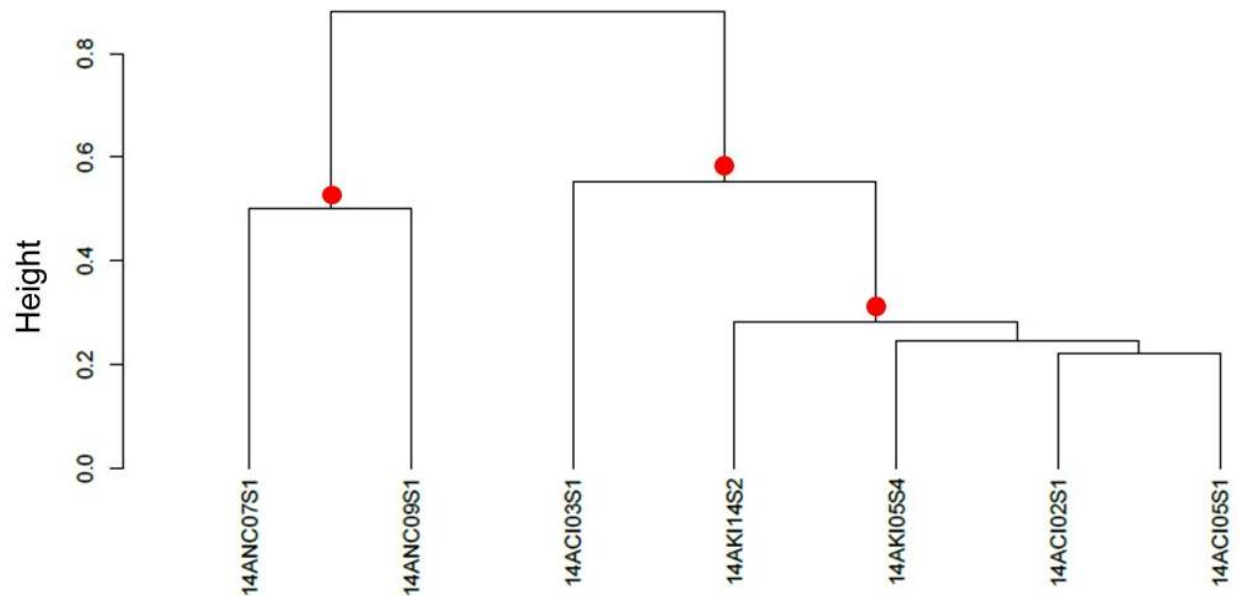

**Figure S1.** Dendrogram representing the similarity of the median sequence of units from theme 14 (song type 1b) for each individual singer recorded at the Kermadec Islands (KI) and the two wintering grounds in which these themes were present (New Caledonia: NC, and the Cook Islands: CI). The median string LSI scores were hierarchically clustered using average-linkage clustering and bootstrapped ( $n = 1000$ ). The AU values (significant  $p$ -values > 95%, red dot [24, 32]) indicated the stability of each split in the tree. This was additionally confirmed using the Cophenetic Correlation Coefficient, which indicated that the structure of the tree was a very good representation of the associations present within the data (CCC= 0.91).

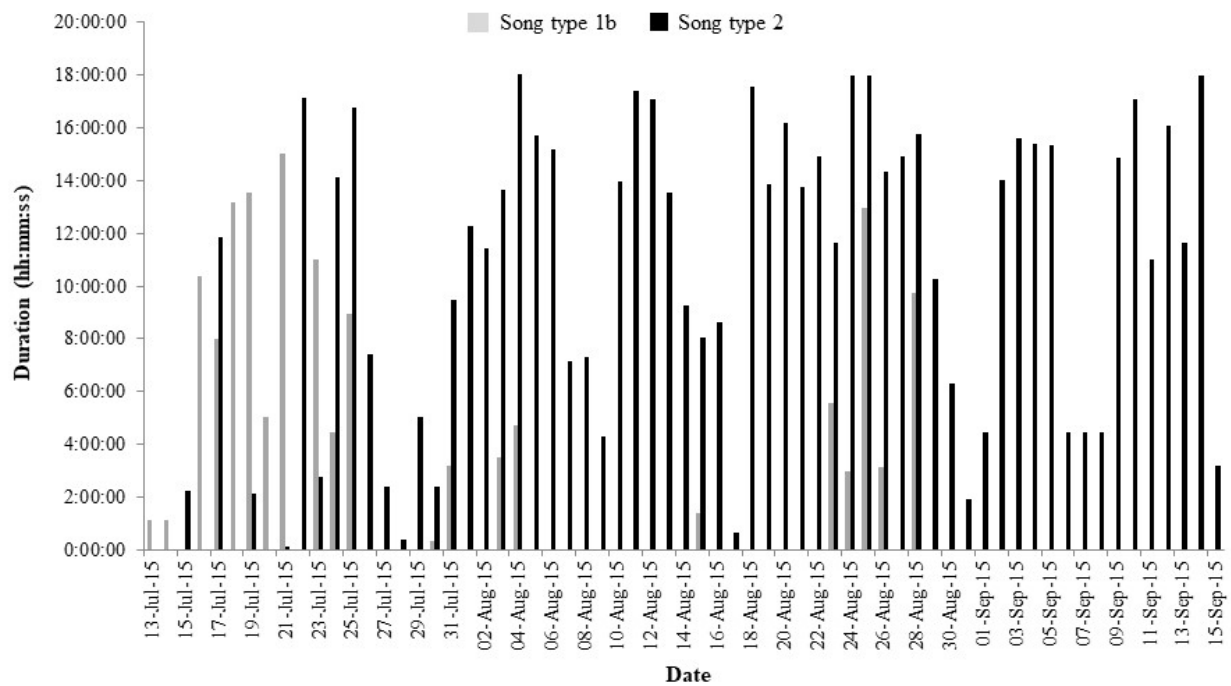

**Figure S2.** Hours per day song type 1b and song type 2 were recorded in New Caledonia between 13 July and 15 September 2015 by the SM2M+ Wildlife Acoustics recorder on an 18-hour duty (recording) cycle.

## 4. Supplementary Audio Files

**Audio S1.** Corresponding audio for song type 1a presented in figure 1.

**Audio S2.** Corresponding audio for song type 1b presented in figure 1.

**Audio S3.** Corresponding audio for song type 2 presented in figure 1.

**Audio S4.** Corresponding audio for song type 3 presented in figure 1.
